# Supplementary material
Source: PubMed Central journal article supplement (PMC4441581)

# SUPPLEMENTAL FIGURE 1

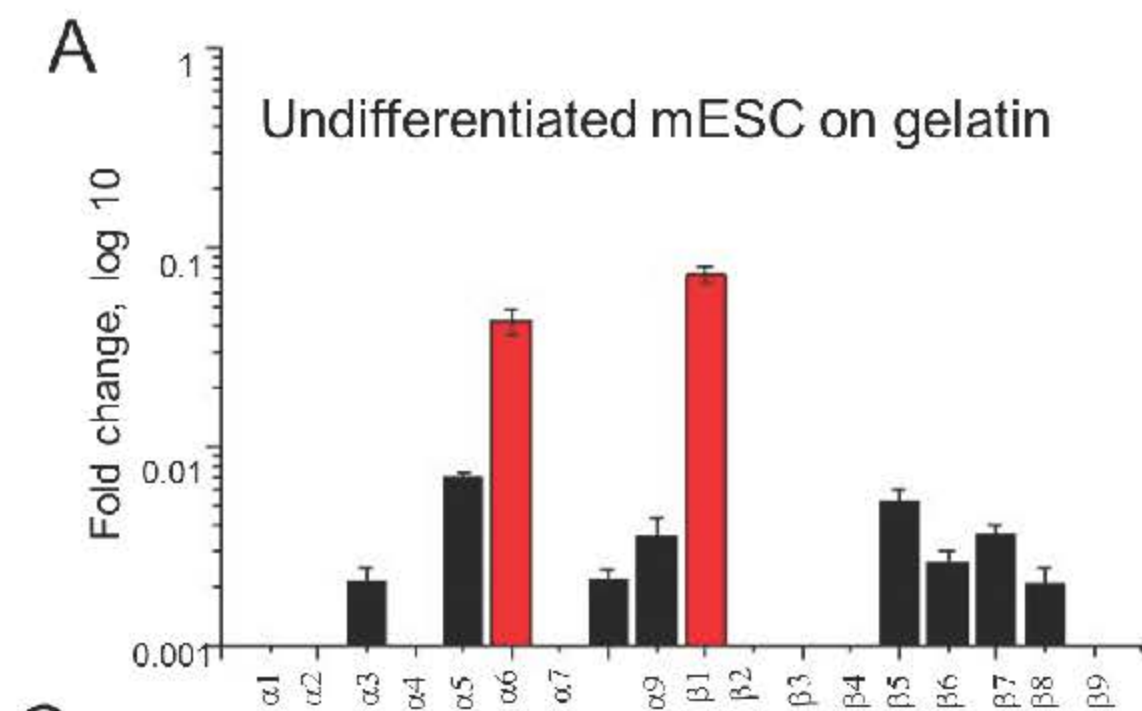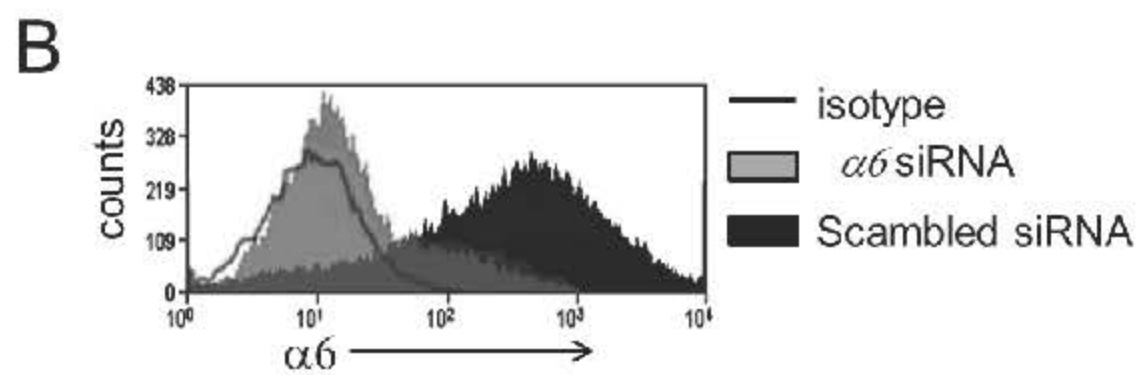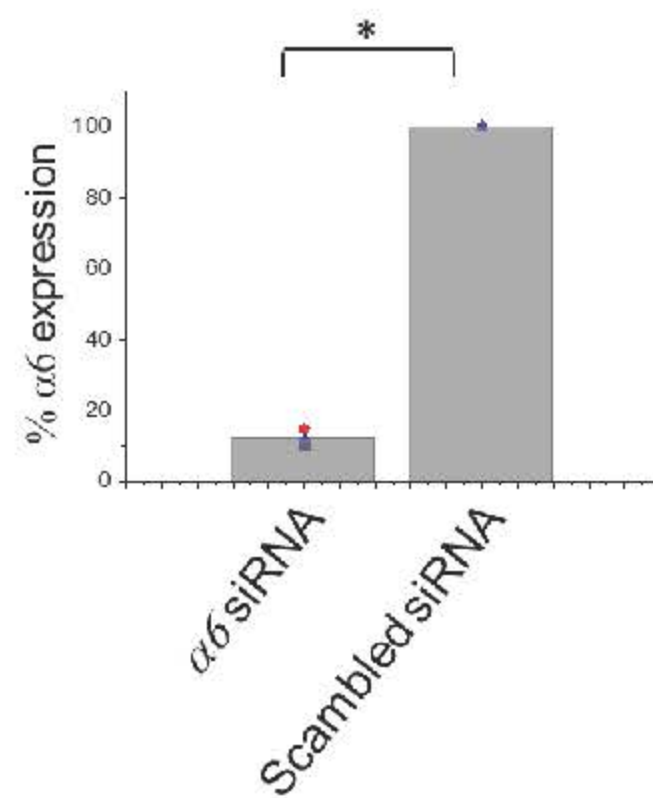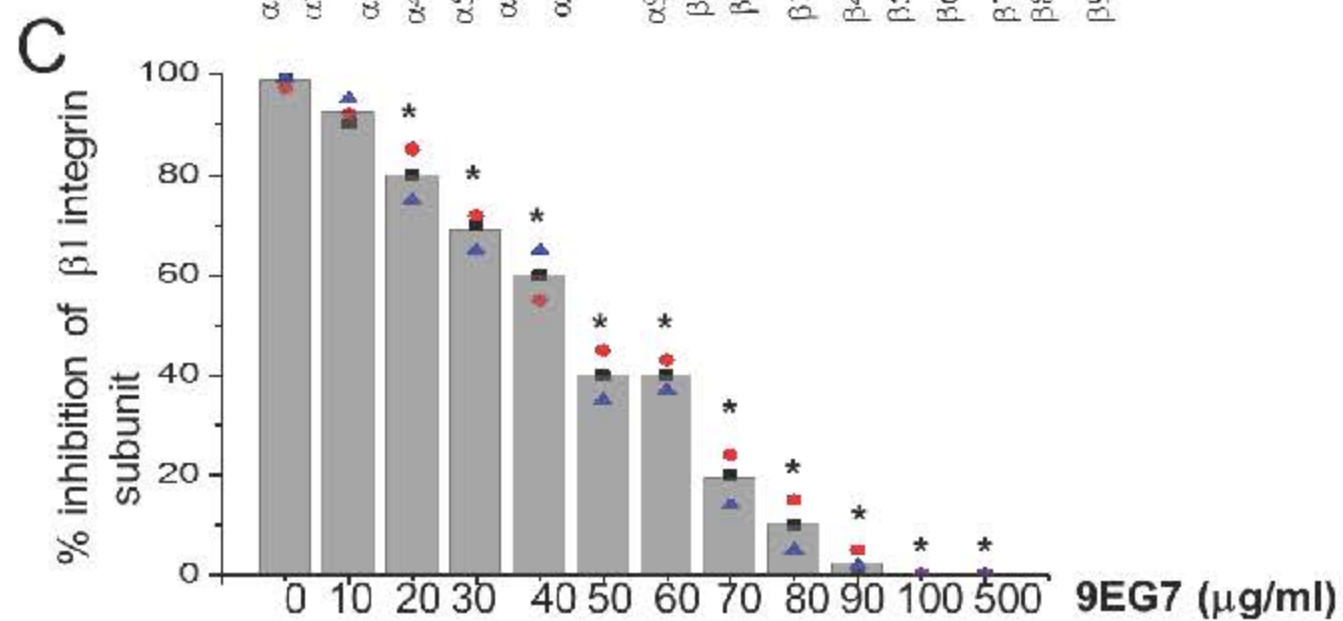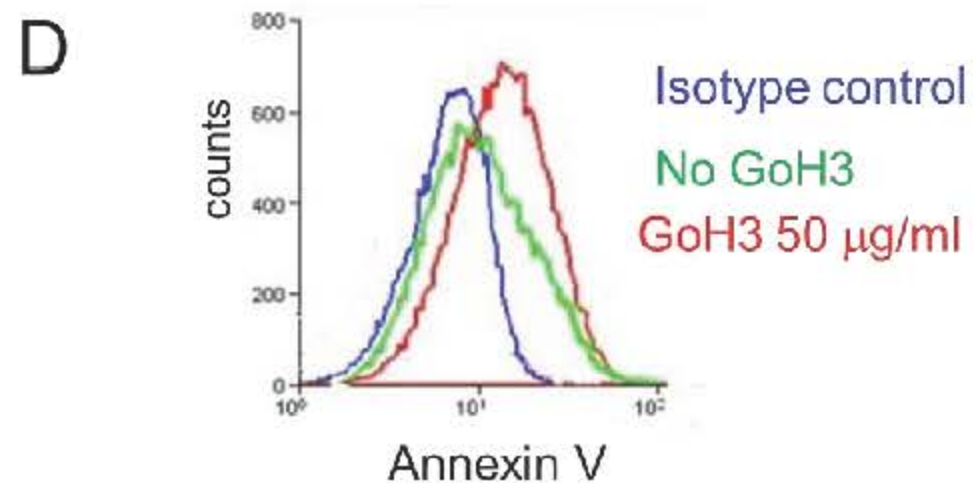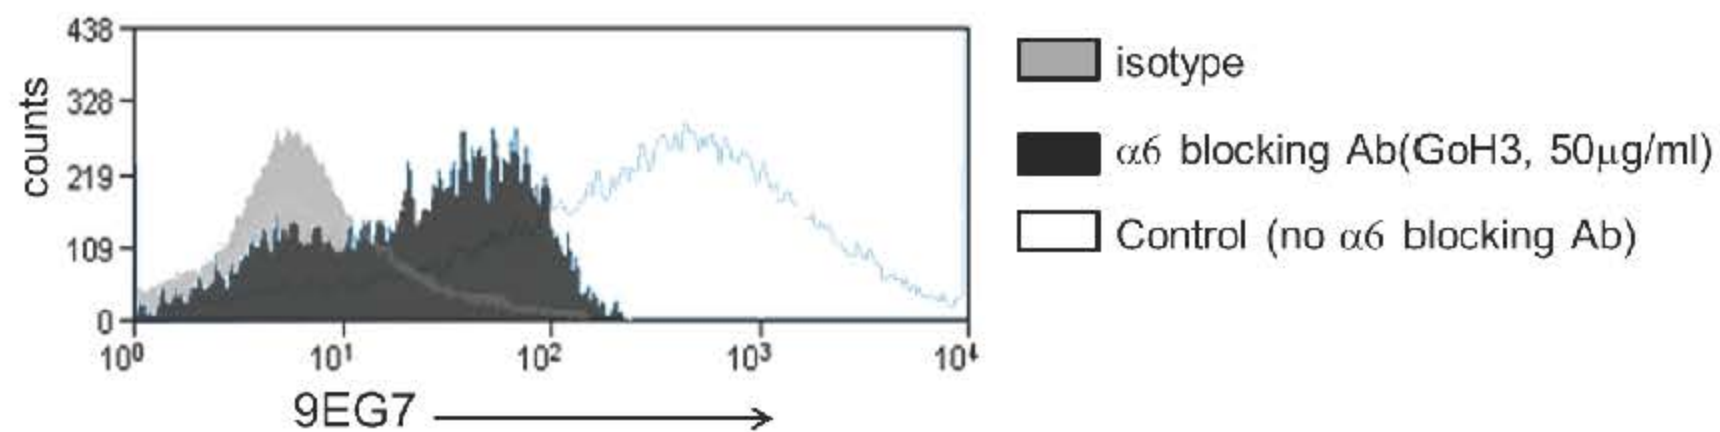

# SUPPLEMENTAL FIGURE 2

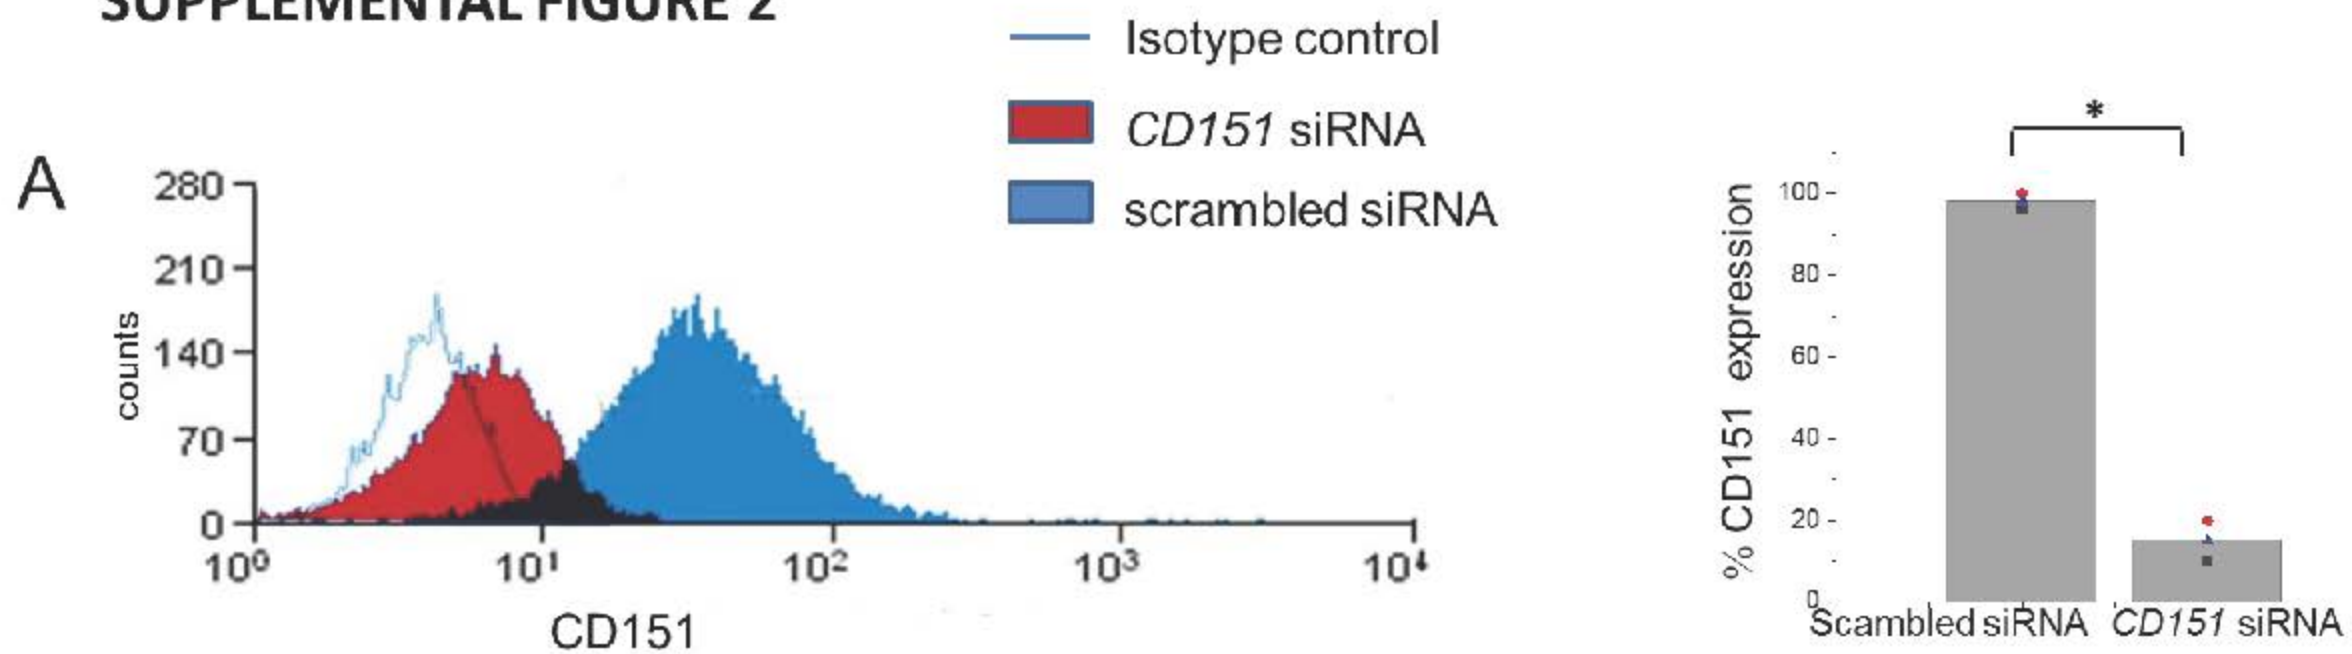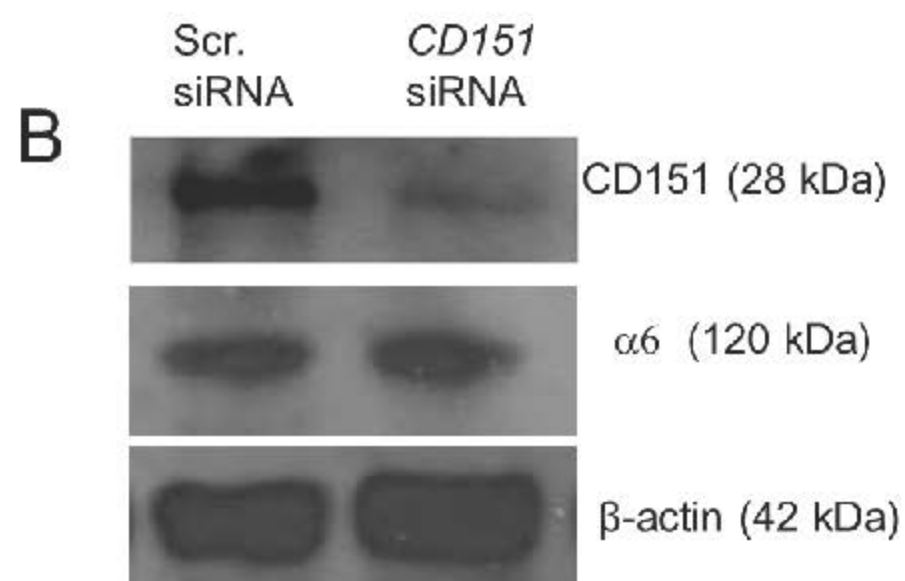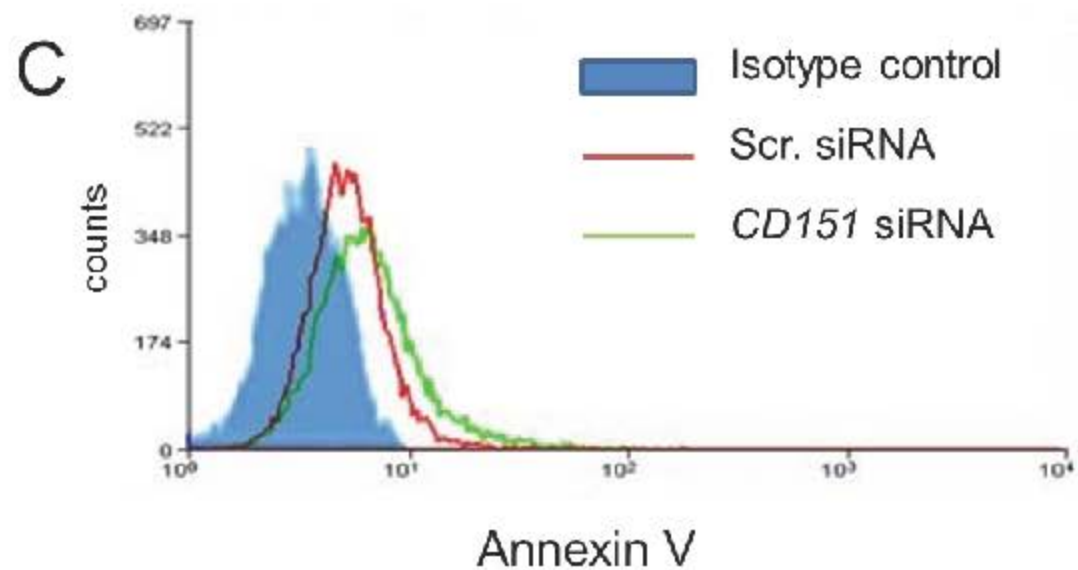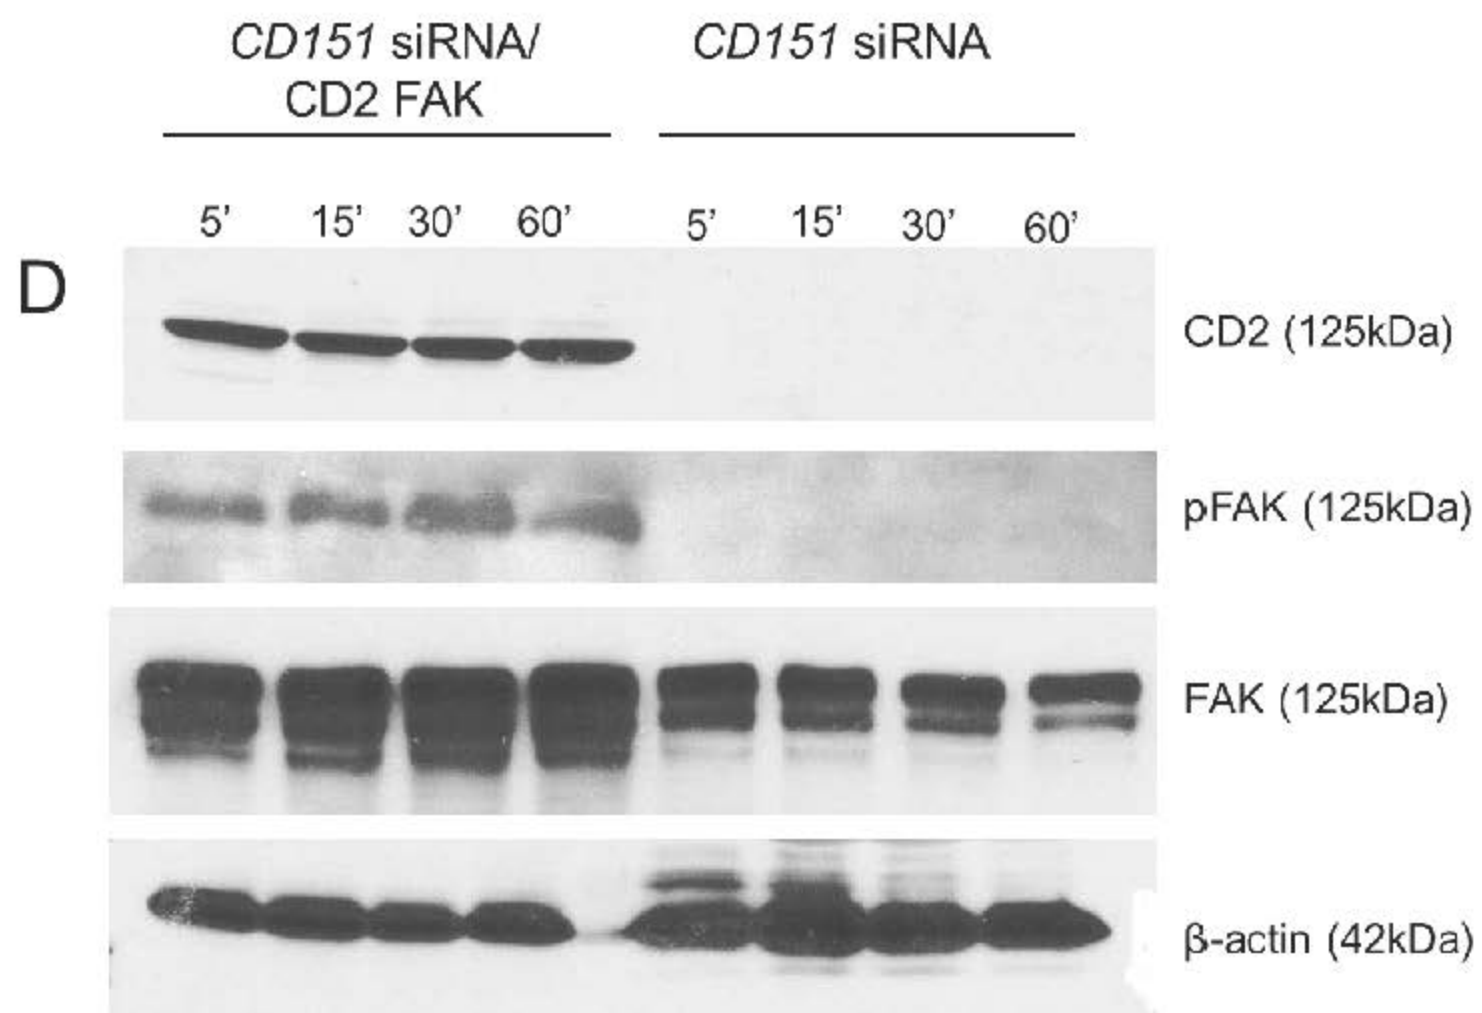

# SUPPLEMENTAL FIGURE 3

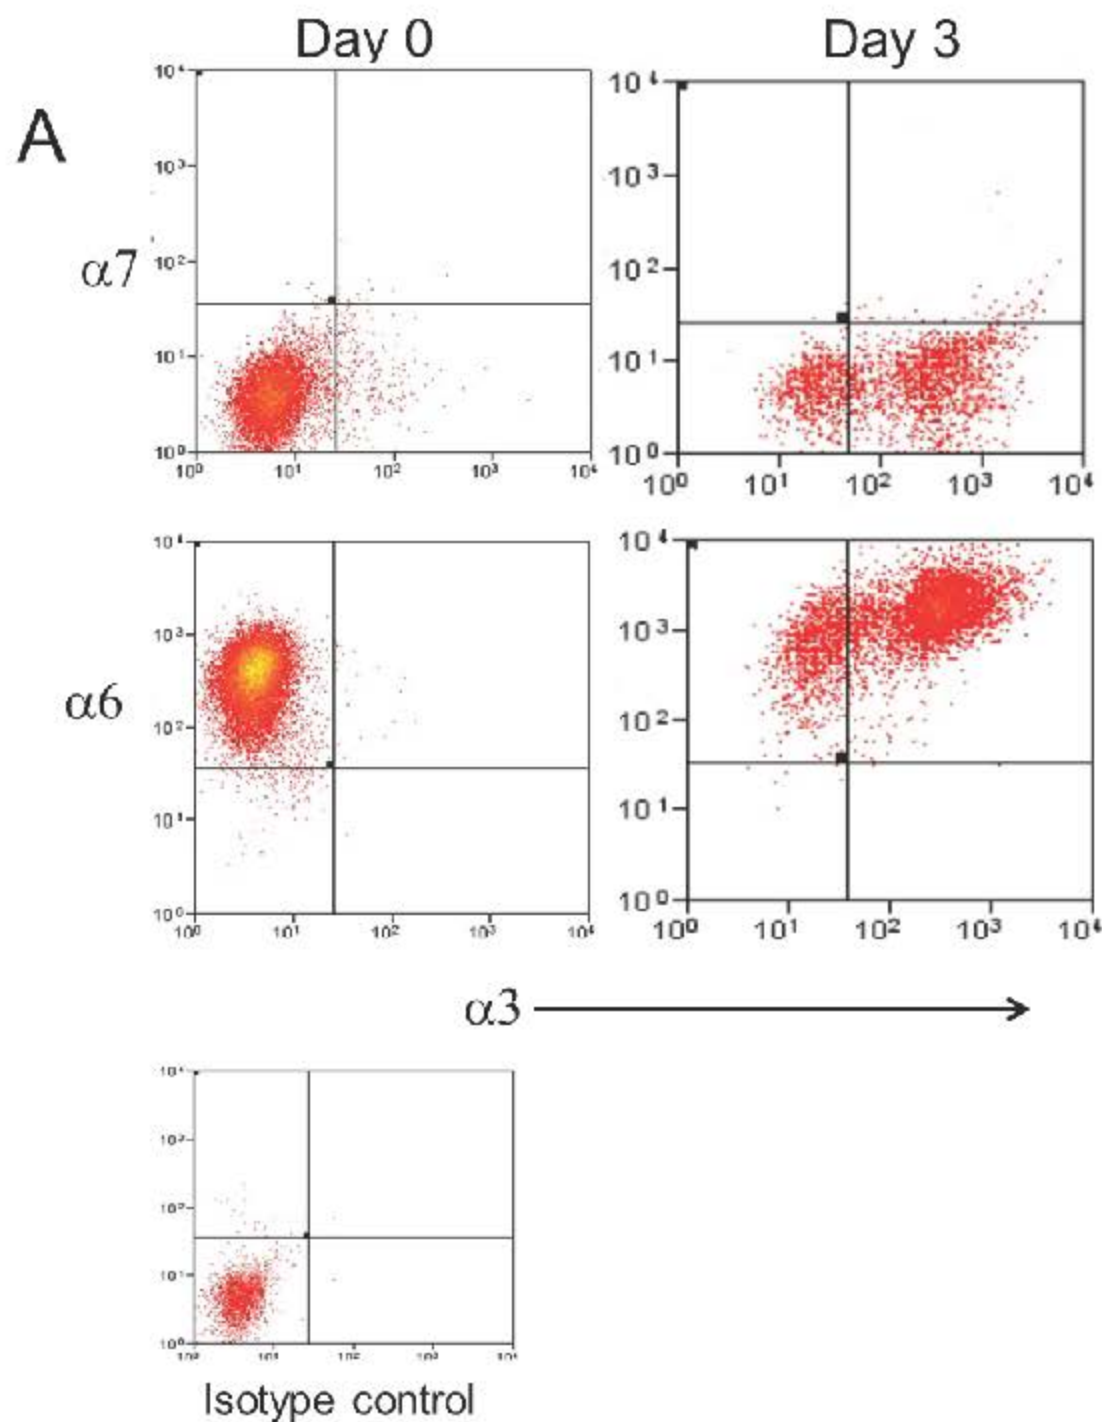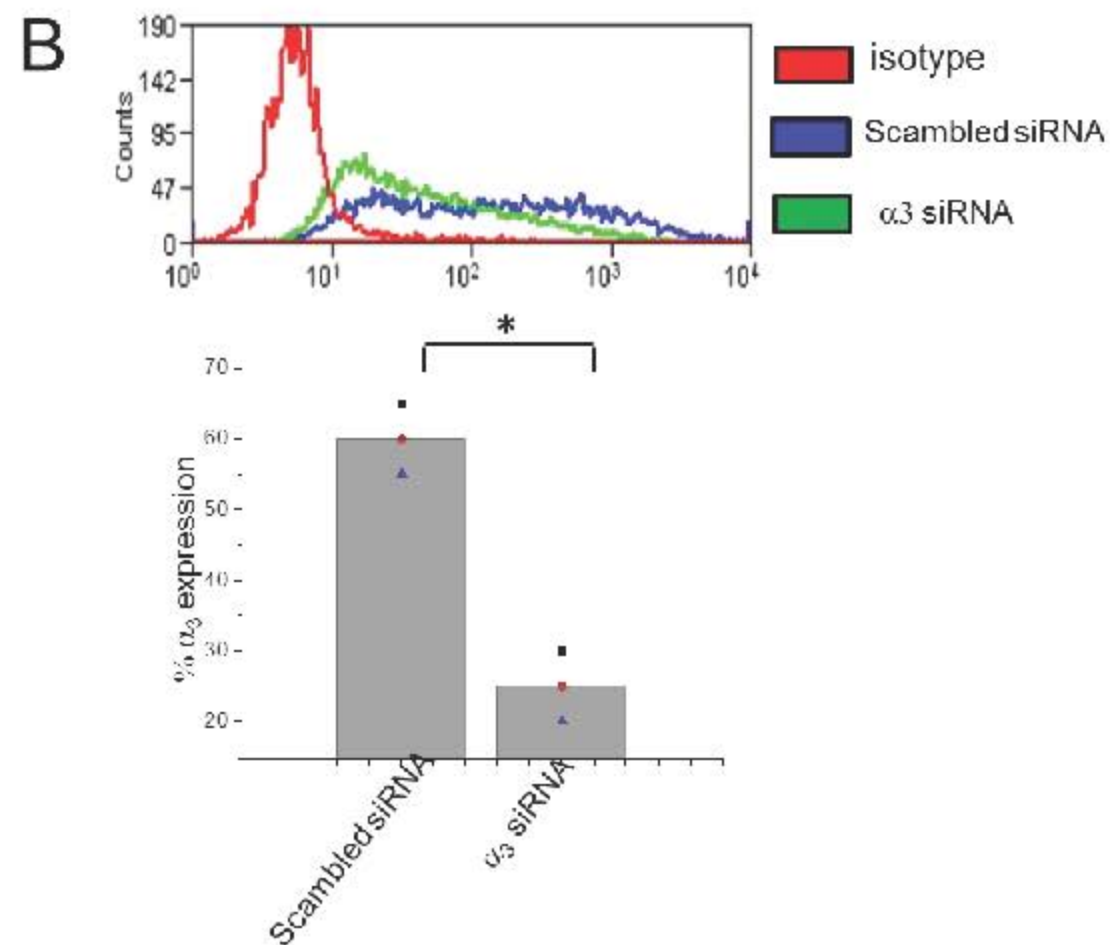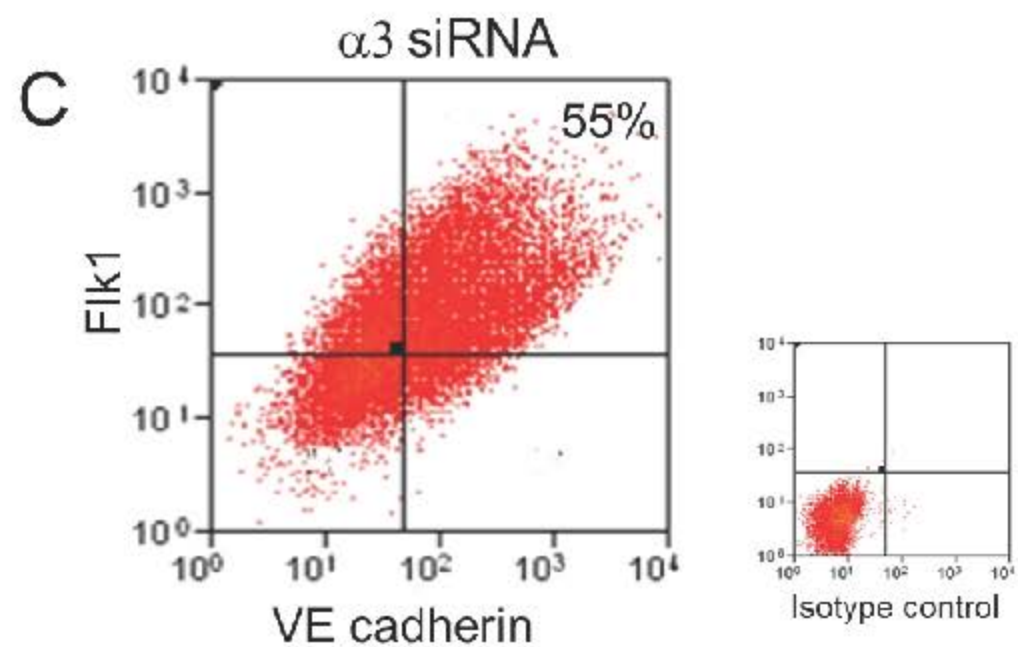

# SUPPLEMENTAL FIGURE 4

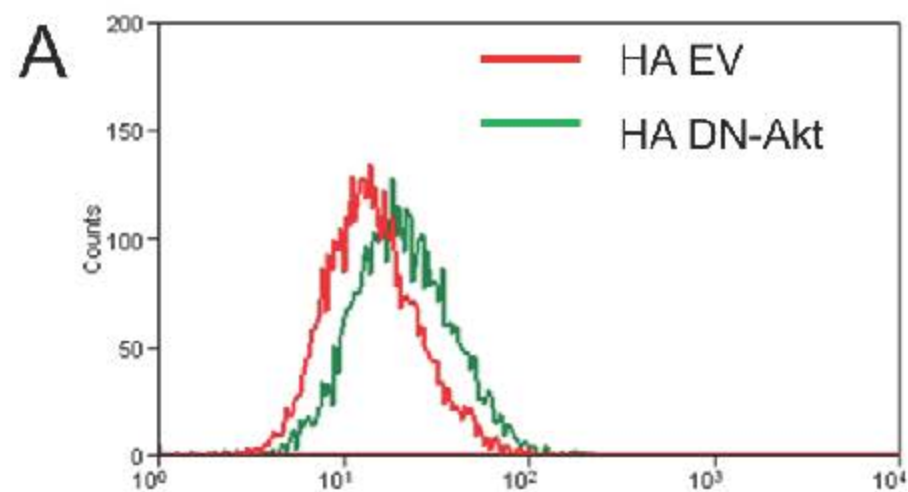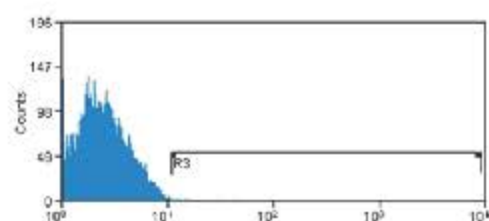

Non transfected controls

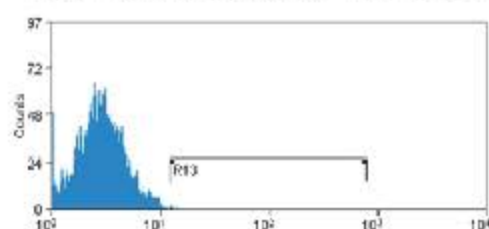

Isotype control

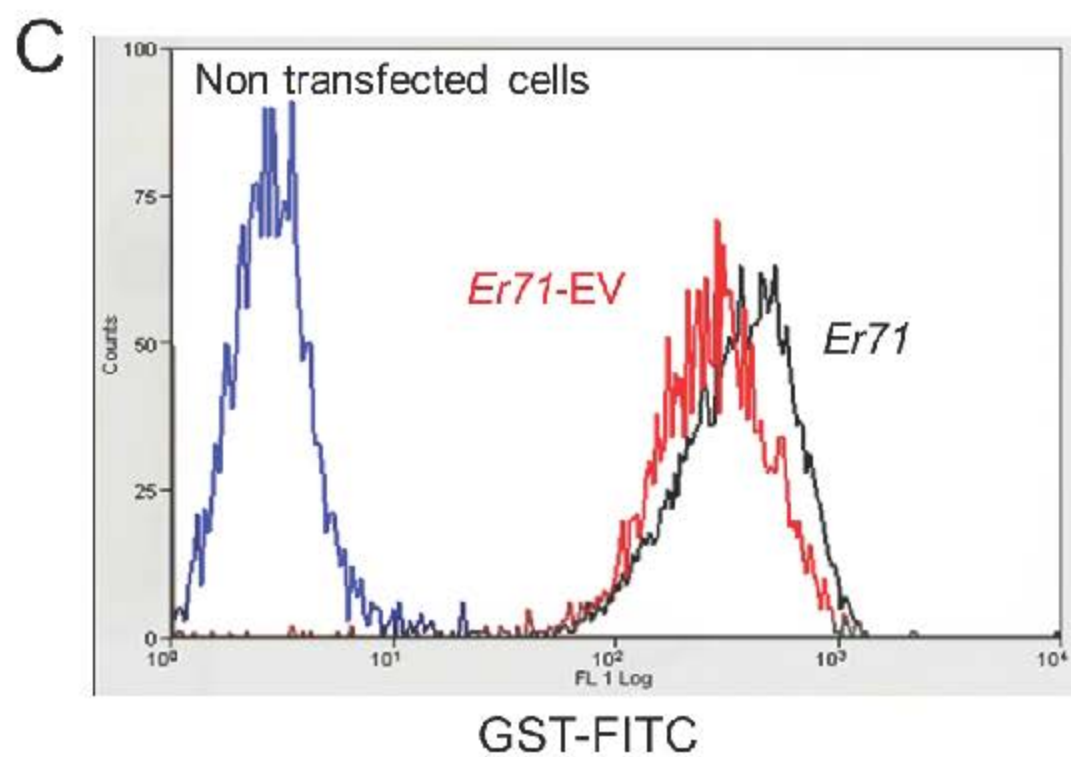

**B**

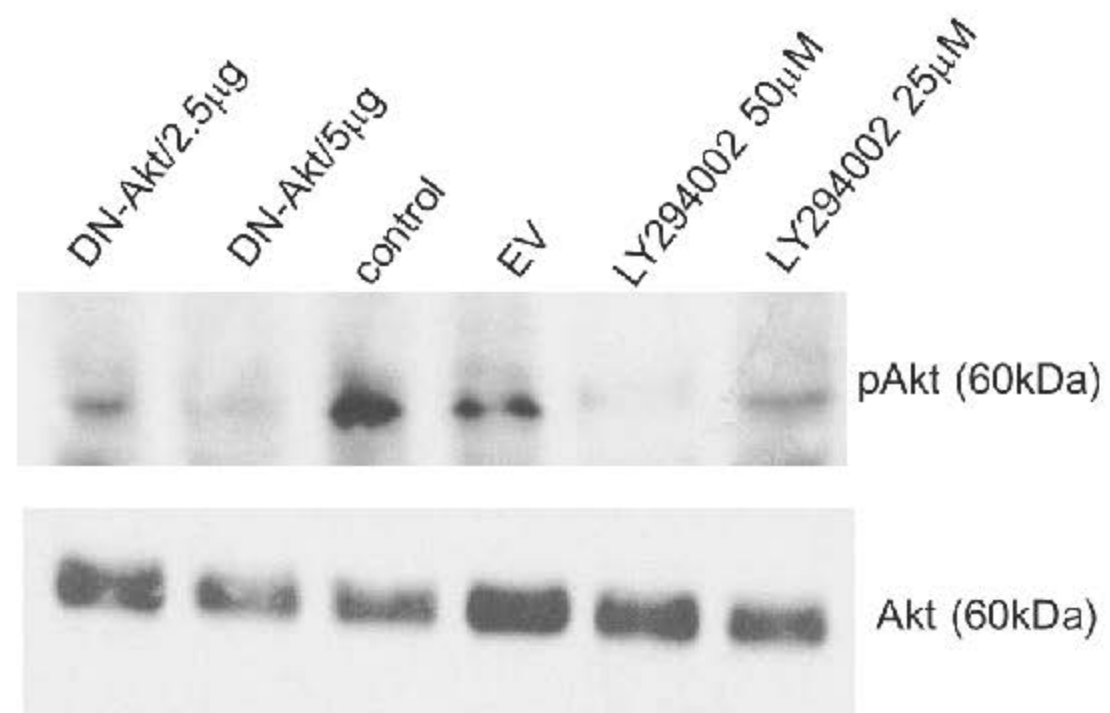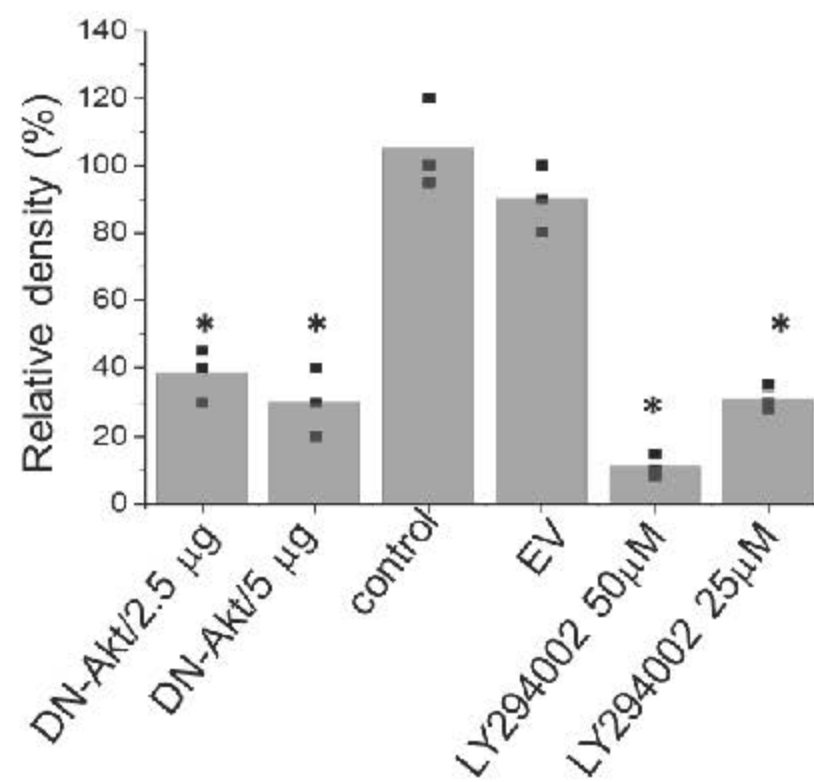

**D**

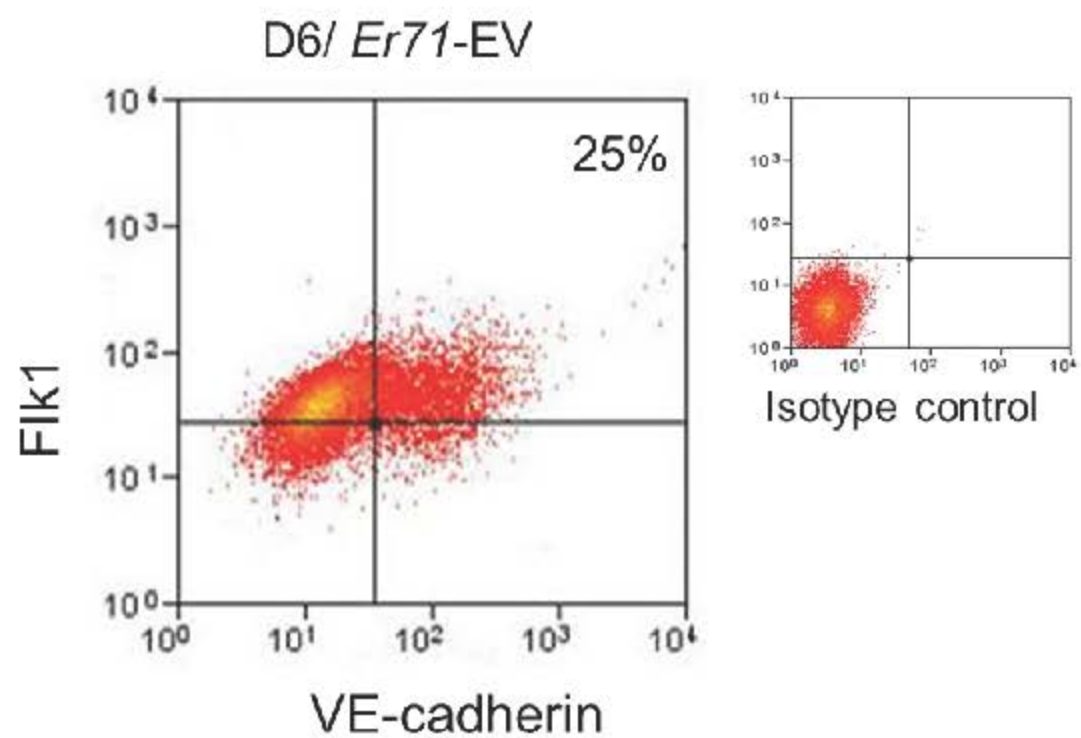

# SUPPLEMENTAL FIGURE 5

## A

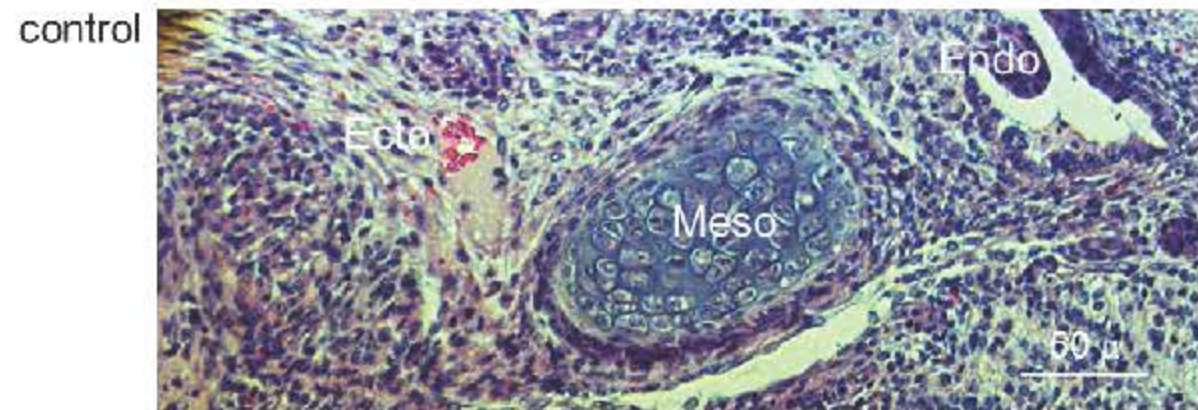

$\alpha 6$  siRNA

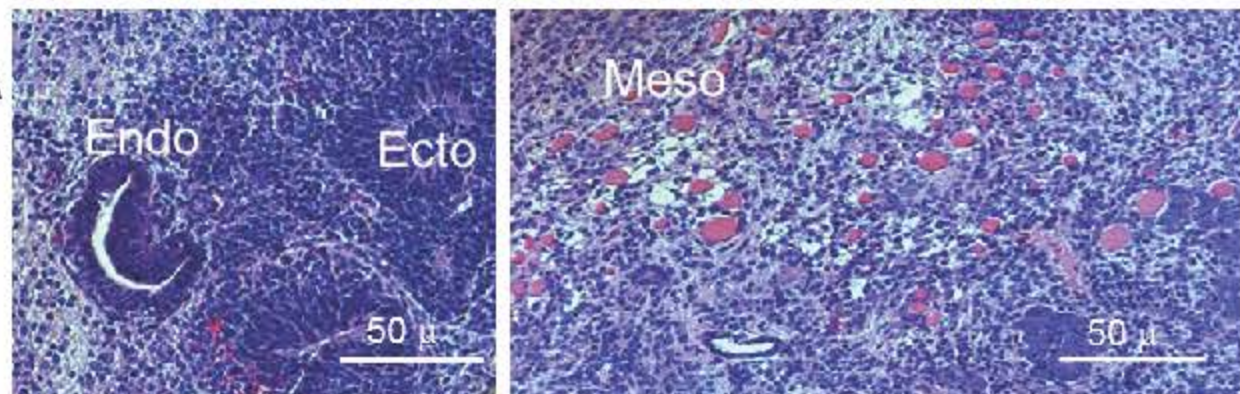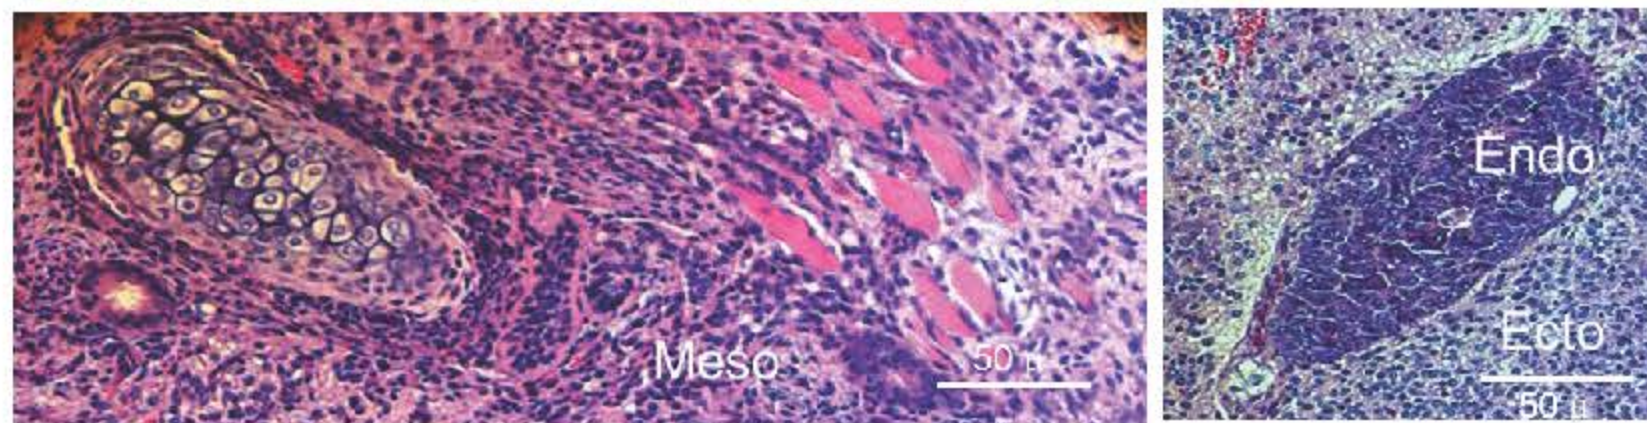

## B

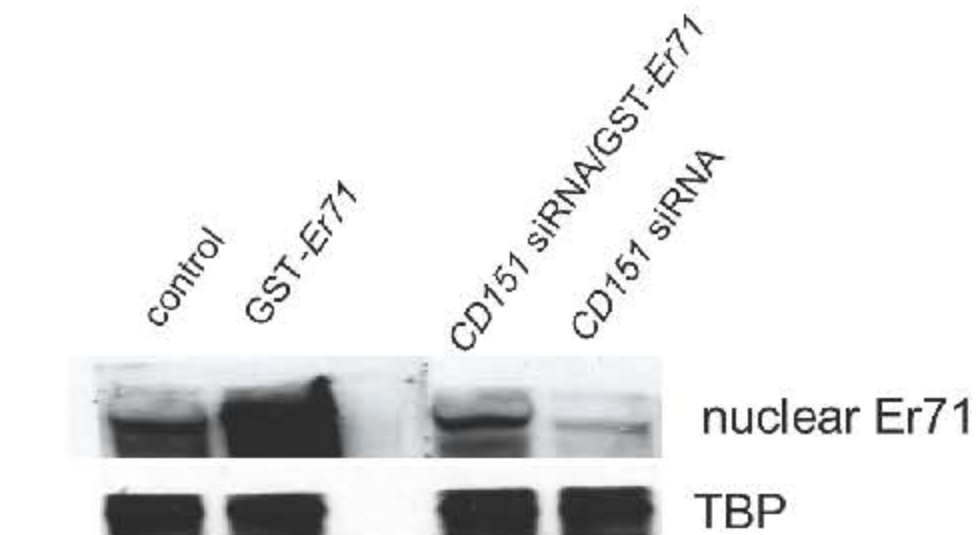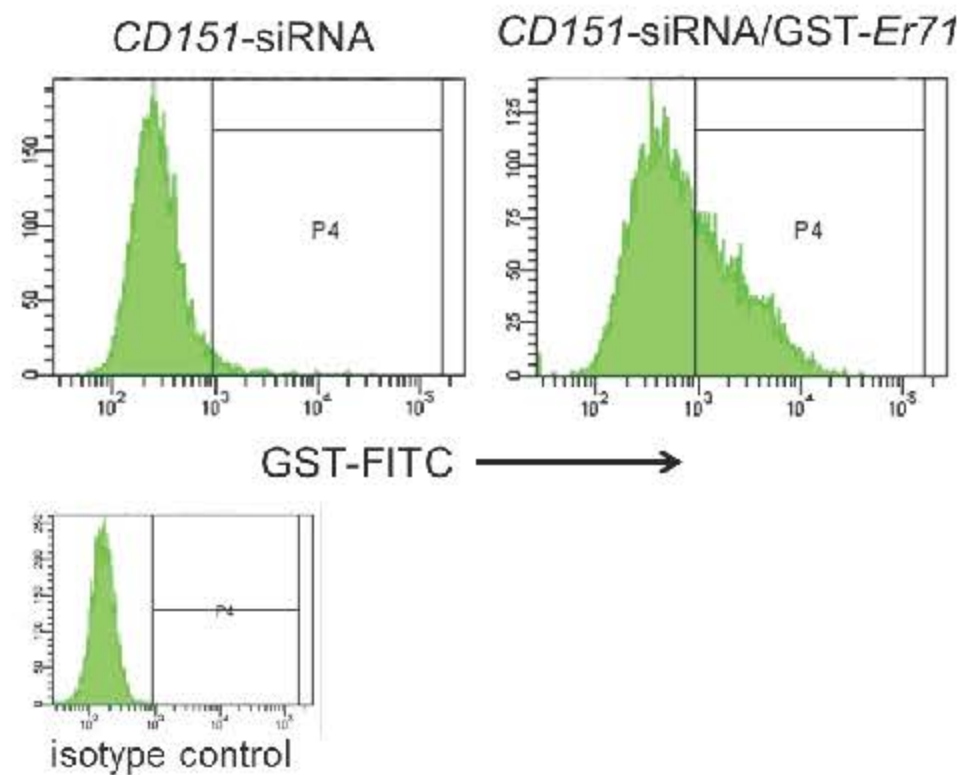

Supplement: NIHMS685702-supplement-Supp_FigureS1-S5.pdf [file NIHMS685702-supplement-Supp_FigureS1-S5.pdf]
